# Supplementary material for: Cellular uptake of allicin in the hCMEC/D3 human brain endothelial cells: exploring blood-brain barrier penetration in an in vitro model
Source: PeerJ. 2024 Jul 17;12:e17742. doi: 10.7717/peerj.17742 (PMC11260074; doi:10.7717/peerj.17742)
Supplement: Data S2 — Raw data of fluorescent intensity form reactive oxygen species (ROS) detection assays at 3 h, corresponding to Figure 2. Raw data of calculated area peaks from HPLC chromatograms used for data analysis in Figure 4A-D. Raw data of calculated allicin concentration in both apical (AP) and basolateral (BL) samples of the cell-free control insert, corresponding to Fig 3I-J and Figure S1. Raw data of calculated allicin concentration in the cellular uptake experiments used for data analysis in Figure 4A-D. [file peerj-12-17742-s002.xlsx]

## Sheet: 1. MTT assay
Cell viability assay (MTT assay)
1. Results at 3 h
Allicin concentration (µg/ml)	0	0.5	1	2	5	10
% Proliferation N1	99.2	116.56	108.227	107.334	78.9632	72.1184
% Proliferation N2	103.2	111.25	107.844	105.161	111.043	60.4752
% Proliferation N3	97.6	108.531	97.7952	103.554	106.872	72.9072
Average	100	112.114	104.622	105.35	98.9595	68.5003
SEM	1.66538	3.10645	4.76414	2.22442	10.7906	2.98183
2. Results at 24 h
Allicin concentration (µg/ml)	0	0.5	1	2	5
% Proliferation N1	84.0872	93.1745	83.3603	51.0097	13.2068
% Proliferation N2	101.05	105.412	101.777	55.6139	22.8998
% Proliferation N3	114.863	145.396	115.59	77.7868	39.9838
Average	100	114.661	100.242	61.4701	25.3635
SEM	8.89987	15.7688	9.33569	8.26612	7.82764

## Sheet: 2. ROS detection
ROS detection assay
Allicin concentration (µg/ml)	0	0.5	1	2	5	10	TBHP (Positive control)
Fluorescence Intensity N1	11495.8	6115.67	7189.58	8018	22212.3	28447.3	89173.7
Fluorescence Intensity N2	3926.33	5738.67	7389.83	11764.8	18517.1	18989.6	124777
Fluorescence Intensity N4	9295	10688.7	13549.7	22540.7	26682.7	39700	159855
Average	8966.33	5600.56	5979.08	8267.81	15270.6	20791	99248
SEM	2520.08	344.276	1311.94	1950.96	5204.77	4003.15	12858.9

## Sheet: 3. Stanadard curve of allicin
Standard curve of allicin from HPLC analysis
Retention time (min)	Allicin concentration (µg/ml)	Area peak
8.784	0.5	17.4003
	1	29.7186
	1.5	43.666
	2	52.0206
	3	80.9372
	4	102.211
	5	142.629

## Sheet: 4. Cell-free control insert
Allicin concentration of AP and BL samples of the cell-free control insert
Sample	Allicin concentration (µg/ml)
AP	1.97
BL	1.09

## Sheet: 5. Cellular uptake experiments
Cellular uptake experiments
1. Allicin tested in the absence and presence of hCMEC/D3 cells at a density of 1 x 104 cells
Allicin concentration (µg/ml)	Tested with 0.5 µg/ml		Tested with 1 µg/ml		Tested with 2 µg/ml		Tested with 5 µg/ml
	No cells	Cells	No cells	Cells	No cells	Cells	No cells	Cells
N1	0.6612	0.0888	1.29056	0.12114	2.56672	0.4621	5.49712	5.24708
N2	0.514511	0.098978	0.937236	0.164795	1.88553	0.278665	4.38338	2.80228
N3	0.48937	0.0894544	0.868972	0.102666	1.68994	0.31987	3.83221	2.50837
Average	0.555027	0.0924108	1.03226	0.129534	2.0474	0.353545	4.5709	3.51924
SEM	0.05358	0.003289	0.130647	0.01842	0.265729	0.055566	0.489678	0.868075
2. Allicin 5 µg/ml tested in the absence and presence of hCMEC/D3 cells at a density of 1 x 104 and 5 x 104 cells
Allicin concentration (µg/ml)	No cells	1 x 104 Cells	No cells	5 x 104 Cells
N1	5.49712	5.24708	5.49712	0*	* not detectable
N2	4.38338	2.80228	4.38338	0.0849273
N3	3.83221	2.50837	3.83221	0.0854692
Average	4.5709	3.51924	4.5709	0.0851983
SEM	0.489678	0.868075	0.489678	0.000221
3. Allicin 5 µg/ml tested with various densities of hCMEC/D3 cells
Allicin concentration (µg/ml)	No cells	1 x 104 Cells	2.5 x 104 Cells	5 x 104 Cells	7.5 x 104 Cells
N1	4.85	2.39	1.15	0	0
N2	5.23	2.13	0.71	0	0
N3	4.25	1.65	0	0	0
Average	4.77667	2.05667	0.62	0	0
SEM	0.285276	0.21675	0.335022	0	0
4. The hCMEC/D3 cells at a density of 5 x 104 cells were tested with allicin 5 µg/ml at different incubation periods
Time (h)	0	0.5	1	1.5	2	2.5	3
Allicin concentration (µg/ml)
No cells N1	5.3	4.86	5.02	4.99	4.68	4.82	4.82
No cells N2	5.53	5.32	5.53	5.18	5.26	5.32	5.09
No cells N3	5.03	4.94	4.94	4.67	3.8	3.99	4.96
Average	5.28667	5.04	5.16333	4.94667	4.58	4.71	4.95667
SEM	0.048165	0.047299	0.061596	0.049605	0.141478	0.12929	0.025987
Cells N1	5.73	0	0	0	0	0	0
Cells N2	5.41	0	0	0	0	0	0
Cells N3	5.78	0	0	0	0	0	0
Average	5.64	0	0	0	0	0	0
SEM	0.038635	0	0	0	0	0	0		5.3	4.86	5.02	4.99	4.68	4.82	4.82
									5.53	5.32	5.53	5.18	5.26	5.32	5.09
									5.03	4.94	4.94	4.67	3.8	3.99	4.96

## Sheet: 6. % LY rejection
%LY Rejection
N1
Insert 1	Before allicin test	After allicin test			3N
BL conc.	0.3485	0.2772				Before	After
%LY rejection	98.2575	98.614			N1	98.2641	97.1204
					N2	97.2303	92.642
Insert 2	Before allicin test	After allicin test			N3	97.3501	95.3637
BL conc.	0.372	0.6647			Average	97.6148	95.042
%LY rejection	98.14	96.6765			SD	0.565467	2.25649
Insert 3	Before allicin test	After allicin test
BL conc.	0.3272	0.6641			%LY before allicin test = 97.61 ± 0.57%
%LY rejection	98.364	96.6795			%LY after allicin test = 95.04 ± 2.26%
Insert 4	Before allicin test	After allicin test
BL conc.	0.3276	0.7327
%LY rejection	98.362	96.3365
Insert 5	Before allicin test	After allicin test
BL conc.	0.327	0.6411
%LY rejection	98.365	96.7945
Insert 6	Before allicin test	After allicin test
BL conc.	0.3808	0.4757
%LY rejection	98.096	97.6215
N2
Insert 1	Before allicin test	After allicin test
BL conc.	0.575628	1.35751
%LY rejection	97.1219	93.2124
Insert 2	Before allicin test	After allicin test
BL conc.	0.544117	1.59399
%LY rejection	97.2794	92.0301
Insert 3	Before allicin test	After allicin test
BL conc.	0.563503	1.47362
%LY rejection	97.1825	92.6319
Insert 4	Before allicin test	After allicin test
BL conc.	0.54259	1.47539
%LY rejection	97.2871	92.623
Insert 5	Before allicin test	After allicin test
BL conc.	0.565101	1.46456
%LY rejection	97.1745	92.6772
N3
Insert 1	Before allicin test	After allicin test
BL conc.	0.539246	0.765762
%LY rejection	97.3038	96.1712
Insert 2	Before allicin test	After allicin test
BL conc.	0.516046	0.768419
%LY rejection	97.4198	96.1579
Insert 3	Before allicin test	After allicin test
BL conc.	0.469821	0.828634
%LY rejection	97.6509	95.8568
Insert 4	Before allicin test	After allicin test
BL conc.	0.575021	1.13184
%LY rejection	97.1249	94.3408
Insert 5	Before allicin test	After allicin test
BL conc.	0.525609	1.14105
%LY rejection	97.372	94.2948
Insert 6	Before allicin test	After allicin test
BL conc.	0.554123	0.927812
%LY rejection	97.2294	95.3609
